# Supplementary material for: Expanding the Search for Sperm Transmission Elements in the Mitochondrial Genomes of Bivalve Mollusks
Source: MDPI journal article supplement (doi:10.3390/genes12081211), 2021-08-05
Supplement: s1 [file s1]

Supplemental Information for:

## Expanding the search for sperm transmission elements in the mitochondrial genomes of bivalve mollusks

Donald T Stewart <sup>1, a, \*</sup>, Brent M Robicheau <sup>2, a</sup>, Noor Youssef <sup>2</sup>, Manuel A Garrido-Ramos <sup>3</sup>, Emily E Chase <sup>4</sup> and Sophie Breton <sup>5</sup>

**Table S1.** List of all mitochondrial genomes used in this study. Accession codes can be searched in NCBI [23] for additional information on original publication sources, sequence author(s), etc. Taxonomic name listed is as found in the original GenBank report; some taxonomic names are under debate and may have changed since these sequences were first reported.

| Taxonomy from Sequence Definition  | Accessions | Taxonomic Synonym Given at NCBI |
|------------------------------------|------------|---------------------------------|
| <i>Acanthocardia tuberculata</i>   | NC_008452  | —                               |
| <i>Aculamprotula tientsinensis</i> | NC_029210  | —                               |
| <i>Acuticosta chinensis</i>        | NC_042472  | —                               |
| <i>Alasmidonta heterodon</i>       | NC_037431  | —                               |
| <i>Alasmidonta varicosa</i>        | NC_038155  | —                               |
| <i>Anodonta anatina</i>            | NC_022803  | —                               |
| <i>Anodonta anatina</i>            | KF030962   | —                               |
| <i>Anodonta anatina</i>            | KF030963   | —                               |
| <i>Anodonta arcaiformis</i>        | NC_026674  | —                               |
| <i>Anodonta cygnea</i>             | NC_036488  | —                               |
| <i>Anodonta euscaphys</i>          | NC_026792  | <i>Anemina euscaphys</i>        |
| <i>Anodonta lucida</i>             | NC_026673  | —                               |
| <i>Arconaia lanceolata</i>         | NC_023955  | <i>Lanceolaria lanceolata</i>   |
| <i>Arctica islandica</i>           | NC_022709  | —                               |
| <i>Calypptogena magnifica</i>      | NC_028724  | —                               |
| <i>Cerastoderma edule</i>          | NC_035728  | —                               |
| <i>Coelomactra antiquata</i>       | NC_021375  | <i>Mactra antiquata</i>         |
| <i>Crassostrea angulata</i>        | NC_012648  | —                               |
| <i>Crassostrea ariakensis</i>      | NC_012650  | —                               |
| <i>Crassostrea belcheri</i>        | NC_037851  | —                               |
| <i>Crassostrea gasar</i>           | NC_027653  | —                               |
| <i>Crassostrea gigas</i>           | NC_001276  | —                               |
| <i>Crassostrea hongkongensis</i>   | NC_011518  | —                               |
| <i>Crassostrea iredalei</i>        | NC_013997  | —                               |
| <i>Crassostrea nippona</i>         | NC_015248  | —                               |
| <i>Crassostrea sikamea</i>         | NC_012649  | —                               |
| <i>Crassostrea sp.</i>             | NC_018763  | —                               |
| <i>Crassostrea virginica</i>       | NC_007175  | —                               |
| <i>Cristaria plicata</i>           | NC_012716  | —                               |
| <i>Cumberlandia monodonta</i>      | KU873124   | —                               |

|                                               |           |                                 |
|-----------------------------------------------|-----------|---------------------------------|
| <i>Cumberlandia monodonta</i>                 | NC_034846 | —                               |
| <i>Cuneopsis capitata</i>                     | NC_042469 | <i>Cuneopsis capitatus</i>      |
| <i>Cuneopsis heudei</i>                       | NC_042471 | —                               |
| <i>Cuneopsis pisciculus</i>                   | NC_026306 | —                               |
| <i>Cyclina sinensis</i>                       | NC_029478 | —                               |
| <i>Dahurinaia dahurica</i>                    | NC_023942 | <i>Margaritifera dahurica</i>   |
| <i>Donax semiestriatus</i>                    | NC_035984 | —                               |
| <i>Donax trunculus</i>                        | NC_035985 | —                               |
| <i>Donax variegatus</i>                       | NC_035986 | —                               |
| <i>Donax vittatus</i>                         | NC_035987 | —                               |
| <i>Dosinia altior</i>                         | NC_037916 | —                               |
| <i>Dosinia japonica</i>                       | NC_038063 | —                               |
| <i>Dosinia troscheli</i>                      | NC_037917 | —                               |
| <i>Echyriddella menziesii</i>                 | KU873122  | —                               |
| <i>Echyriddella menziesii</i>                 | NC_034845 | —                               |
| <i>Fulvia mutica</i>                          | NC_022194 | —                               |
| <i>Gari elongata</i>                          | NC_042422 | —                               |
| <i>Gibbosula crassa</i>                       | NC_037942 | —                               |
| <i>Hiatula acuta</i>                          | NC_042421 | —                               |
| <i>Hippopus hippopus</i>                      | NC_039944 | —                               |
| <i>Hyriopsis cumingii</i>                     | NC_011763 | —                               |
| <i>Hyriopsis schlegelii</i>                   | NC_015110 | <i>Sinohyriopsis schlegelii</i> |
| <i>Hyriopsis schlegelii</i>                   | HQ641407  | <i>Sinohyriopsis schlegelii</i> |
| <i>Katharina tunicata</i> (Outgroup for tree) | NC_001636 | —                               |
| <i>Lamprotula caveata</i>                     | KX091842  | —                               |
| <i>Lamprotula caveata</i>                     | NC_030336 | —                               |
| <i>Lamprotula coreana</i>                     | NC_026035 | —                               |
| <i>Lamprotula gottschei</i>                   | KJ627225  | —                               |
| <i>Lamprotula gottschei</i>                   | NC_023806 | —                               |
| <i>Lamprotula leai</i>                        | NC_023346 | <i>Lamprotula leaii</i>         |
| <i>Lamprotula leai</i>                        | KC847114  | <i>Lamprotula leaii</i>         |
| <i>Lamprotula scripta</i>                     | NC_030258 | —                               |
| <i>Lamprotula tortuosa</i>                    | NC_021404 | —                               |
| <i>Lampsilis ornata</i>                       | NC_005335 | —                               |
| <i>Lampsilis powellii</i>                     | NC_037720 | —                               |
| <i>Lampsilis powellii</i>                     | MF326972  | —                               |
| <i>Lampsilis siliquoidea</i>                  | MF326974  | —                               |
| <i>Lampsilis siliquoidea</i>                  | NC_037721 | —                               |
| <i>Lanceolaria grayana</i>                    | NC_026686 | <i>Lanceolaria grayii</i>       |
| <i>Lasmigona compressa</i>                    | NC_015481 | —                               |
| <i>Lepidodesma languilati</i>                 | NC_029491 | —                               |
| <i>Leptodea leptodon</i>                      | NC_028522 | <i>Potamilus leptodon</i>       |
| <i>Lutraria maxima</i>                        | NC_036766 | —                               |

|                                    |           |                            |
|------------------------------------|-----------|----------------------------|
| <i>Lutraria rhynchaena</i>         | NC_023384 | —                          |
| <i>Mactra chinensis</i>            | NC_025510 | —                          |
| <i>Margaritifera falcata</i>       | NC_015476 | —                          |
| <i>Margaritifera margaritifera</i> | NC_043836 | —                          |
| <i>Margaritifera marocana</i>      | NC_034911 | <i>Pseudunio marocanus</i> |
| <i>Margaritifera marocana</i>      | KY131954  | <i>Pseudunio marocanus</i> |
| <i>Meretrix lamarckii</i>          | NC_016174 | —                          |
| <i>Meretrix lamarckii</i>          | KP244452  | —                          |
| <i>Meretrix lusoria</i>            | NC_014809 | —                          |
| <i>Meretrix lyrata</i>             | NC_022924 | —                          |
| <i>Meretrix meretrix</i>           | NC_013188 | —                          |
| <i>Meretrix petechialis</i>        | NC_012767 | —                          |
| <i>Modiolus modiolus</i>           | NC_033537 | —                          |
| <i>Moerella iridescent</i>         | NC_018371 | <i>Iridona iridescent</i>  |
| <i>Monodontina vondembuschiana</i> | NC_044112 | —                          |
| <i>Mutela dubia</i>                | NC_034844 | —                          |
| <i>Mytilus californianus</i>       | NC_015993 | —                          |
| <i>Mytilus edulis</i>              | AY823624  | —                          |
| <i>Mytilus edulis</i>              | NC_006161 | —                          |
| <i>Mytilus galloprovincialis</i>   | AY363687  | —                          |
| <i>Mytilus galloprovincialis</i>   | NC_006886 | —                          |
| <i>Mytilus galloprovincialis</i>   | DQ399833  | —                          |
| <i>Mytilus trossulus</i>           | GU936626  | —                          |
| <i>Mytilus trossulus</i>           | KM192127  | —                          |
| <i>Mytilus trossulus</i>           | NC_007687 | —                          |
| <i>Nodularia douglasiae</i>        | NC_026111 | —                          |
| <i>Nuttallia olivacea</i>          | NC_018373 | —                          |
| <i>Ostrea denselamellosa</i>       | NC_015231 | —                          |
| <i>Ostrea edulis</i>               | NC_016180 | —                          |
| <i>Ostrea lurida</i>               | NC_022688 | —                          |
| <i>Paphia amabilis</i>             | NC_016889 | —                          |
| <i>Paphia euglypta</i>             | NC_014579 | —                          |
| <i>Paphia textile</i>              | NC_016890 | <i>Paratapes textilis</i>  |
| <i>Paphia undulata</i>             | NC_016891 | <i>Paratapes undulatus</i> |
| <i>Pilsbryconcha exilis</i>        | NC_044124 | —                          |
| <i>Potamilus alatus</i>            | NC_033858 | —                          |
| <i>Potomida littoralis</i>         | NC_030073 | —                          |
| <i>Potomida littoralis</i>         | KT247375  | —                          |
| <i>Pyganodon grandis</i>           | FJ809755  | —                          |
| <i>Pyganodon grandis</i>           | NC_013661 | —                          |
| <i>Quadrula quadrula</i>           | FJ809751  | —                          |
| <i>Quadrula quadrula</i>           | NC_013658 | —                          |
| <i>Ruditapes decussatus</i>        | NC_035757 | —                          |

|                                    |           |                                  |
|------------------------------------|-----------|----------------------------------|
| <i>Ruditapes philippinarum</i>     | NC_031332 | —                                |
| <i>Saccostrea cucullata</i>        | NC_027724 | —                                |
| <i>Saccostrea echinata</i>         | NC_036478 | —                                |
| <i>Saccostrea glomerata</i>        | NC_036483 | —                                |
| <i>Saccostrea kegaki</i>           | NC_030533 | —                                |
| <i>Saccostrea mordax</i>           | NC_013998 | —                                |
| <i>Saccostrea mytiloides</i>       | NC_036479 | —                                |
| <i>Sanguinolaria ovalis</i>        | NC_042423 | —                                |
| <i>Saxidomus purpuratus</i>        | NC_026728 | <i>Saxidomus purpurata</i>       |
| <i>Schistodesmus lampreyanus</i>   | NC_042470 | <i>Schistodesmus lampreyanus</i> |
| <i>Semele scabra</i>               | NC_018374 | —                                |
| <i>Sinanodonta woodiana</i>        | KM434235  | —                                |
| <i>Sinanodonta woodiana</i>        | NC_024943 | —                                |
| <i>Sinonovacula constricta</i>     | NC_011075 | —                                |
| <i>Solecurtus divaricatus</i>      | NC_018376 | —                                |
| <i>Solen grandis</i>               | NC_016665 | —                                |
| <i>Solen strictus</i>              | NC_017616 | —                                |
| <i>Solenia carinata</i>            | NC_023250 | —                                |
| <i>Solenia carinata</i>            | KC848655  | —                                |
| <i>Solenia oleivora</i>            | NC_022701 | —                                |
| <i>Solenia oleivora</i>            | KY007143  | —                                |
| <i>Solenia rivularis</i>           | NC_039839 | <i>Parvasolenia rivularis</i>    |
| <i>Solenia rivularis</i>           | KY007142  | <i>Parvasolenia rivularis</i>    |
| <i>Soletellina chinensis</i>       | NC_042420 | <i>Hiatula chinensis</i>         |
| <i>Soletellina diphos</i>          | NC_018372 | <i>Hiatula diphos</i>            |
| <i>Toxolasma parvus</i>            | NC_015483 | <i>Toxolasma parvum</i>          |
| <i>Tridacna derasa</i>             | NC_039945 | —                                |
| <i>Tridacna squamosa</i>           | NC_026558 | —                                |
| <i>Unio crassus</i>                | KY290450  | —                                |
| <i>Unio crassus</i>                | NC_033976 | —                                |
| <i>Unio delphinus</i>              | NC_033854 | —                                |
| <i>Unio delphinus</i>              | KT326918  | —                                |
| <i>Unio douglasiae</i>             | KP970613  | <i>Nodularia douglasiae</i>      |
| <i>Unio japonensis</i>             | AB055624  | <i>Pronodularia japonensis</i>   |
| <i>Unio pictorum</i>               | NC_015310 | —                                |
| <i>Unio tumidus</i>                | NC_033977 | —                                |
| <i>Hyriopsis cumingii</i>          | KC150028  | —                                |
| <i>Limecola balthica</i>           | MN528029  | —                                |
| <i>Utterbackia imbecillis</i>      | NC_015479 | —                                |
| <i>Utterbackia peninsularis</i>    | NC_015477 | —                                |
| <i>Venerupis philippinarum</i>     | AB065374  | <i>Ruditapes philippinarum</i>   |
| <i>Venustaconcha ellipsiformis</i> | NC_013659 | —                                |



and A; threshold = amount of minimum similarity (bp) required for a match.

```
#!/usr/bin/env python3
# -*- coding: utf-8 -*-
"""
Created on Tue Aug 6 11:48:36 2019
Modified on Fri May 21 2021
@author: Noor Youssef

Identifying STE motifs in random sequences
"""
import numpy as np

## Parameters to change ##
nuc_motif = "CCATAAATGTTGAAAATAAGG"

#specify sequence length
length = {"MgaRM" : 3590, "MgaSM": 1529, "MgaF": 1225, "MtrRM": 1070, "MedM": 993, "MedF": 1226,
"Sco": 1602, "Pte": 1986,
         "Can": 1285, "Fmu": 4368, "Mly": 4620, "Lba": 3968, "Hhi": 3027, "Ais": 1497, "Lle":
830, "Lsi": 575, "Tpa": 647, "Pgr": 575, "Ucr": 557}

#specify frequencies pi_T, pi_C, pi_G, pi_A
frequencies = { "MgaRM" : [28.2,15.8,20.9,35.0],
                "MgaSM" : [30.1,15.2,18.9,35.8],
                "MgaF" : [28.0,14.6,25.5,31.9],
                "MtrRM" : [27.9,15.3,19.5,37.3],
                "MedM" : [28.9,15.7,19.4,35.9],
                "MedF" : [28.1,14.3,25.1,32.5],
                "Sco" : [33.1,8.40,24.7,33.8],
                "Pte" : [26.8,11.9,25.4,35.9],
                "Can" : [31.4,27.6,13.3,27.6],
                "Fmu" : [30.7,12.3,22.1,34.9],
                "Mly" : [41.5,5.80,20.8,31.9],
                "Lba" : [35.8,10.6,20.9,32.7],
                "Hhi" : [33.4,12.1,25.7,28.8],
                "Ais" : [37.4,10.2,17.4,35.0],
                "Lle" : [37.5,8.40,26.5,27.6],
                "Lsi" : [34.8,11.1,23.8,30.3],
                "Tpa" : [32.0,10.8,25.8,31.4],
                "Pgr" : [33.7,11.7,19.8,34.8],
                "Ucr" : [31.2,13.5,20.3,35.0]}

# specify threshold
threshold = {"MgaRM" :16,
            "MgaSM" :17,
            "MgaF" :16,
            "MtrRM" :22,
            "MedM" :21,
            "MedF" :16,
            "Sco" :16,
            "Pte" :16,
            "Can" :16,
            "Fmu" :16,
            "Mly" :16,
            "Lba" :18,
            "Hhi" :17,
            "Ais" :16,
            "Lle" :16,
            "Lsi" :16,
            "Tpa" :16,
            "Pgr" :16,
            "Ucr" :16}

#####
nucleotide_converter = {"T":0, "C":1, "G":2, "A":3}
motif = [nucleotide_converter[i] for i in nuc_motif]

def count_num_of_hits(seq, motif, threshold):
    """
```

Counts the number of times (i.e., hits) a given motif is observed in a sequence given a threshold (e.g, 16 nucleotide matches)

```
seq: full sequence
motif: segment we are looking for
threshold: the number of positions that must match
'''
number_hits = 0

# sliding window over sequence
for i in range(len(seq) - len(motif) + 1):
    window = seq[i:i+len(motif)]

    #count the number of similar nucleotides between motif and window
    similarity = sum([1 for x in range(len(motif)) if window[x] == motif[x]])

    #if similarity greater than threshold, count as hit
    if similarity >= threshold:
        number_hits += 1
return(number_hits)

# for each organism extract sequence length, nucleotide frequencies, and threshold
for org in length.keys():
    seq_length = length[org]
    freq       = frequencies[org]
    thresh     = threshold[org]

num_seqs_with_motif = []; num_seqs_unifrom_with_motif = []
for trial in range(1000):

    #generate a random sequence generated from the empirical nucleotide frequency
    seq = np.random.choice(4, seq_length, p= [x/sum(freq) for x in freq])
    seq_unifrom = np.random.choice(4, seq_length, p= [0.25, 0.25, 0.25, 0.25])

    #count the number of times motif was present in the random sequence
    number_hits_per_seq = count_num_of_hits(seq, motif, thresh)
    number_hits_per_seq_unifrom = count_num_of_hits(seq_unifrom, motif, thresh)

    if number_hits_per_seq > 0:
        num_seqs_with_motif.append(number_hits_per_seq)

    if number_hits_per_seq_unifrom > 0:
        num_seqs_unifrom_with_motif.append(number_hits_per_seq_unifrom)

print("Sequences generated from empirical frequencies")
print(org, "Total number of hits", sum(num_seqs_with_motif), "Number of sequences with at-
least one hit", len(num_seqs_with_motif))

print("Sequences generated from uniform frequencies")
print(org, "Total number of hits", sum(num_seqs_unifrom_with_motif), "Number of sequences
with atleast one hit", len(num_seqs_unifrom_with_motif))
```
